# Supplementary material
Source: PubMed Central journal article supplement (PMC6331284)

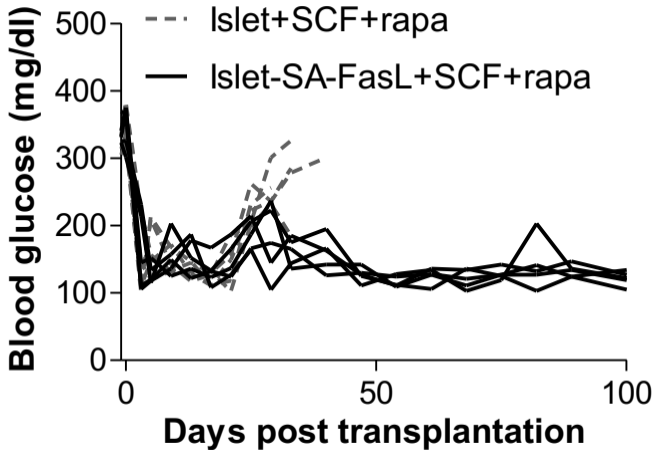

Supplement: NIHMS1514160-supplement-1.pdf [file NIHMS1514160-supplement-1.pdf]

**A**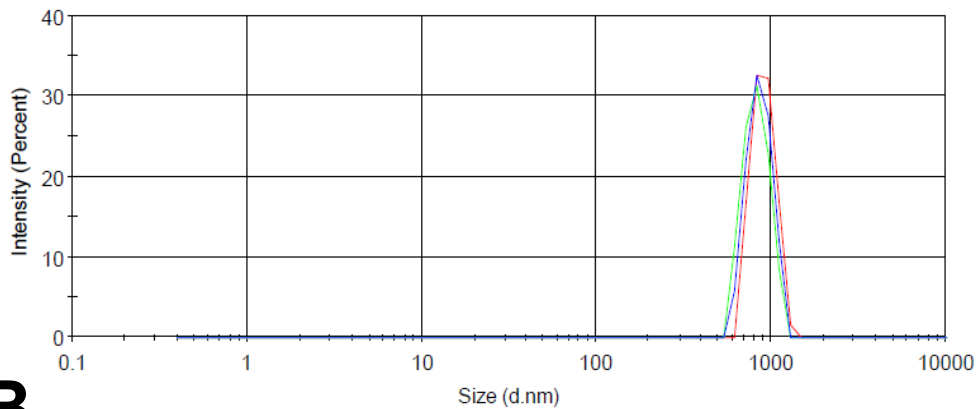**B**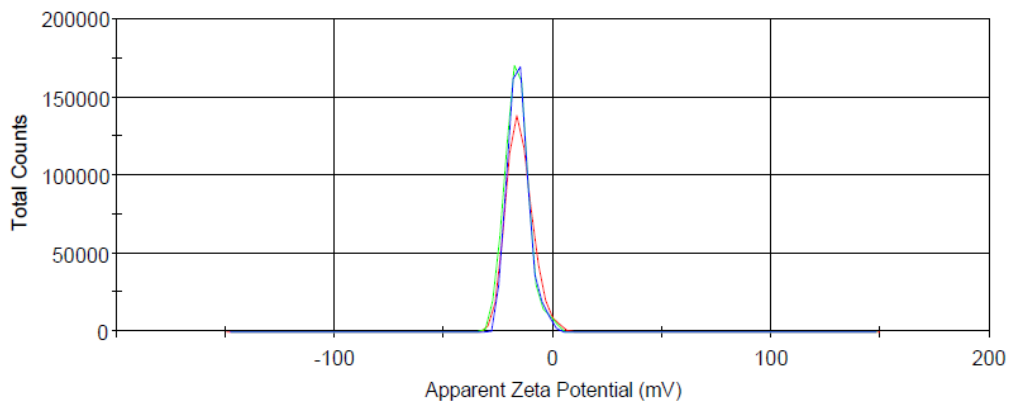

Supplement: NIHMS1514160-supplement-2.pdf [file NIHMS1514160-supplement-2.pdf]
